# Supplementary material
Source: PubMed Central journal article supplement (PMC8260131)
Supplement: kiab165_supplementary_data.pdf [file kiab165_supplementary_data.pdf]

1

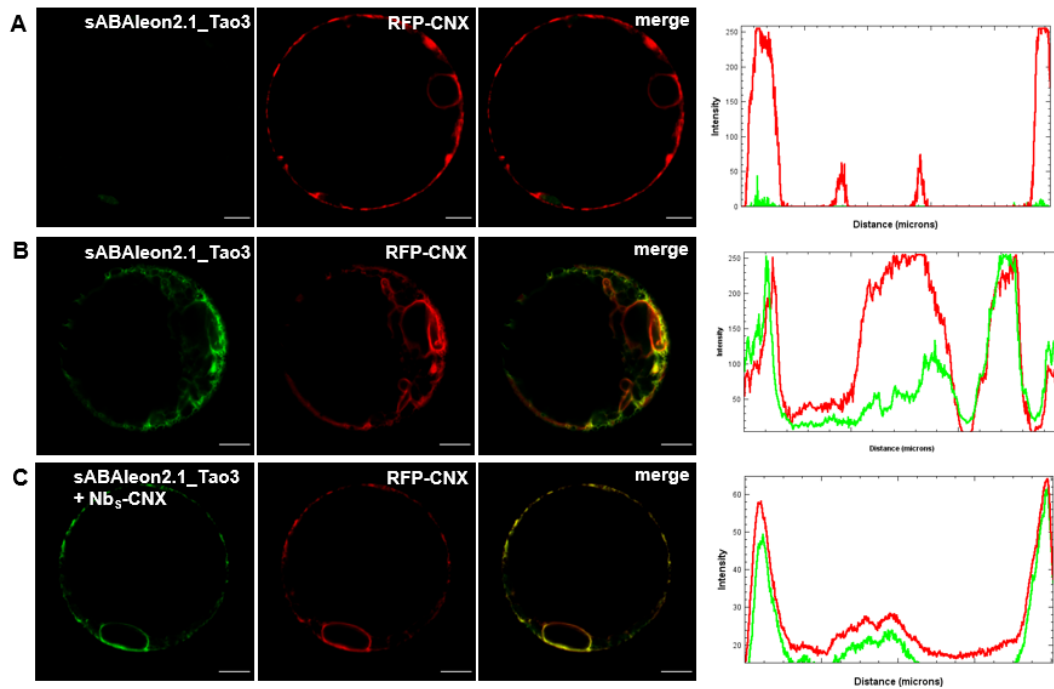

2

3 **Supplemental Figure S1** The secretion and retainment of sABAlcon2.1\_Tao3 in the  
4 ER. **A,B** Expression of sABAlcon2.1\_Tao3 alone resulted in the sensor either secreted  
5 (**A**) or expressed in transit compartments (**B**), as shown by the different fluorescent  
6 signals indicated by the green line (sABAlcon2.1\_Tao3) or the red line (RFP-CNX) in  
7 the intensity plot. **C** Coexpression of sABAlcon2.1\_Tao3 with Nb<sub>s</sub>-CNX resulted in  
8 the colocalization of sABAlcon2.1\_Tao3 with the ER marker RFP-CNX, as indicated  
9 by the overlapping signal peaks in the intensity plot. Scale bars, 5  $\mu$ m.

10

11

12

13

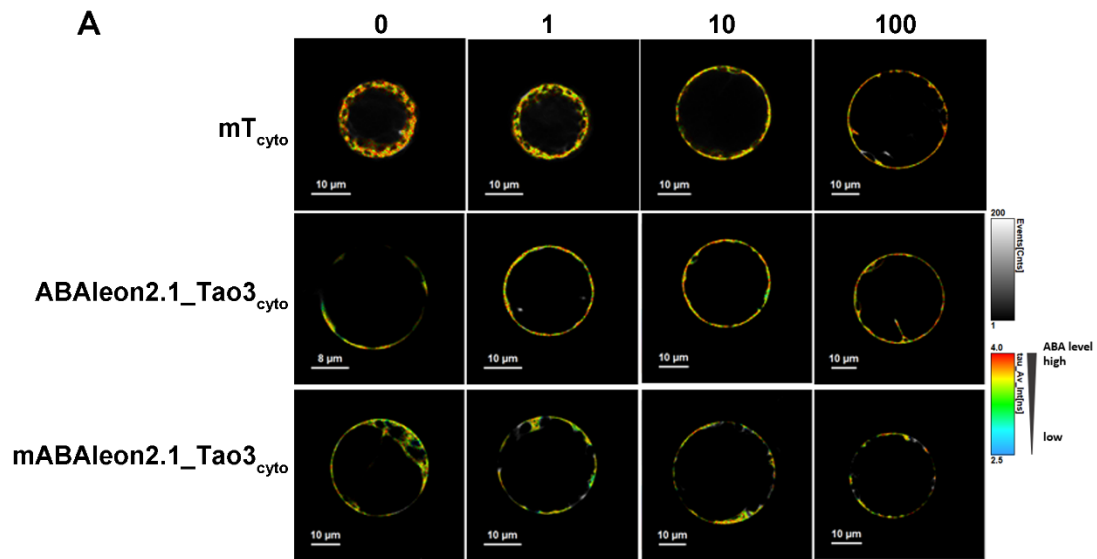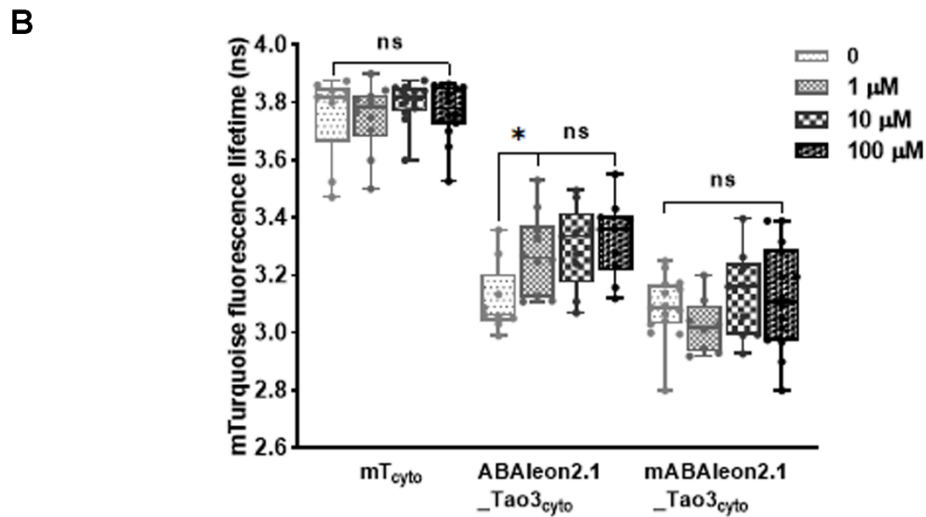

14  
15  
16  
17  
18  
19  
20  
21  
22  
23  
24  
25

**Supplemental Figure S2** Cytosolic ABAlon2.1\_Tao3 shows ABA-induced specific increases in  $\tau_{mT}$ . **A,B** Representative FLIM images (**A**) and data (**B**) show specific increases in  $\tau_{mT}$  in ABAlon2.1\_Tao3<sub>cyto</sub>, but not in that of donor-only (mT<sub>cyto</sub>) and the mutated ABAlon2.1\_Tao3 (mABAlon2.1\_Tao3<sub>cyto</sub>), in which the ABA receptor PYR1 was mutated (R116G). FLIM data are presented as box bars with all data points. Statistics were performed using one-way ANOVA followed by a Duncan's multiple range test (\* $P < 0.05$  comparing different ABA concentrations treated ABAlon2.1\_Tao3<sub>cyto</sub> with mock treated ABAlon2.1\_Tao3<sub>cyto</sub>; ns, not significant).

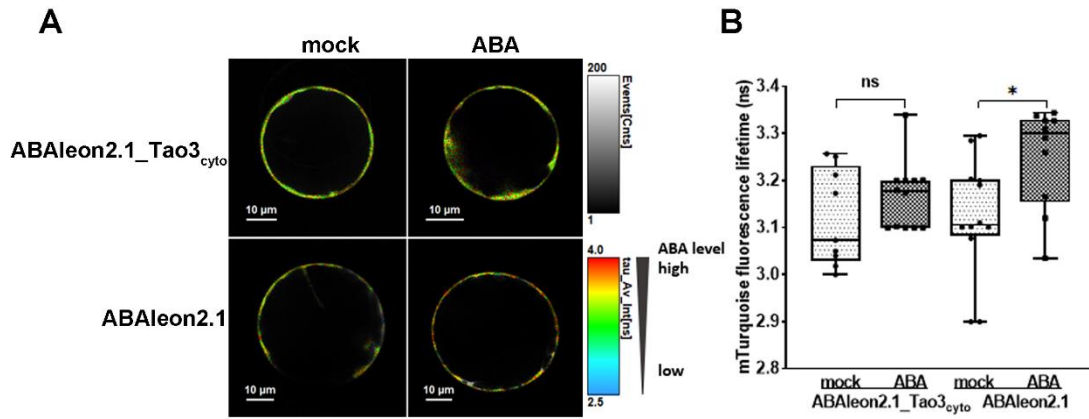

26

27 **Supplemental Figure S3** ABAleon2.1\_Tao3<sub>cyto</sub> shows a lower sensitivity of ABA  
 28 compared with ABAleon2.1. **A,B** Representative FLIM images (**A**) and data (**B**) of the  
 29 ABAleon2.1\_Tao3<sub>cyto</sub> and ABAleon2.1 in response to 100 nM ABA treatment. The  
 30 fluorescence lifetime values are shown as box bars with all data points. n = 9/12.  
 31 Significance was determined by students' t-test (\* $P < 0.05$ ; ns, not significant).

32

33

34

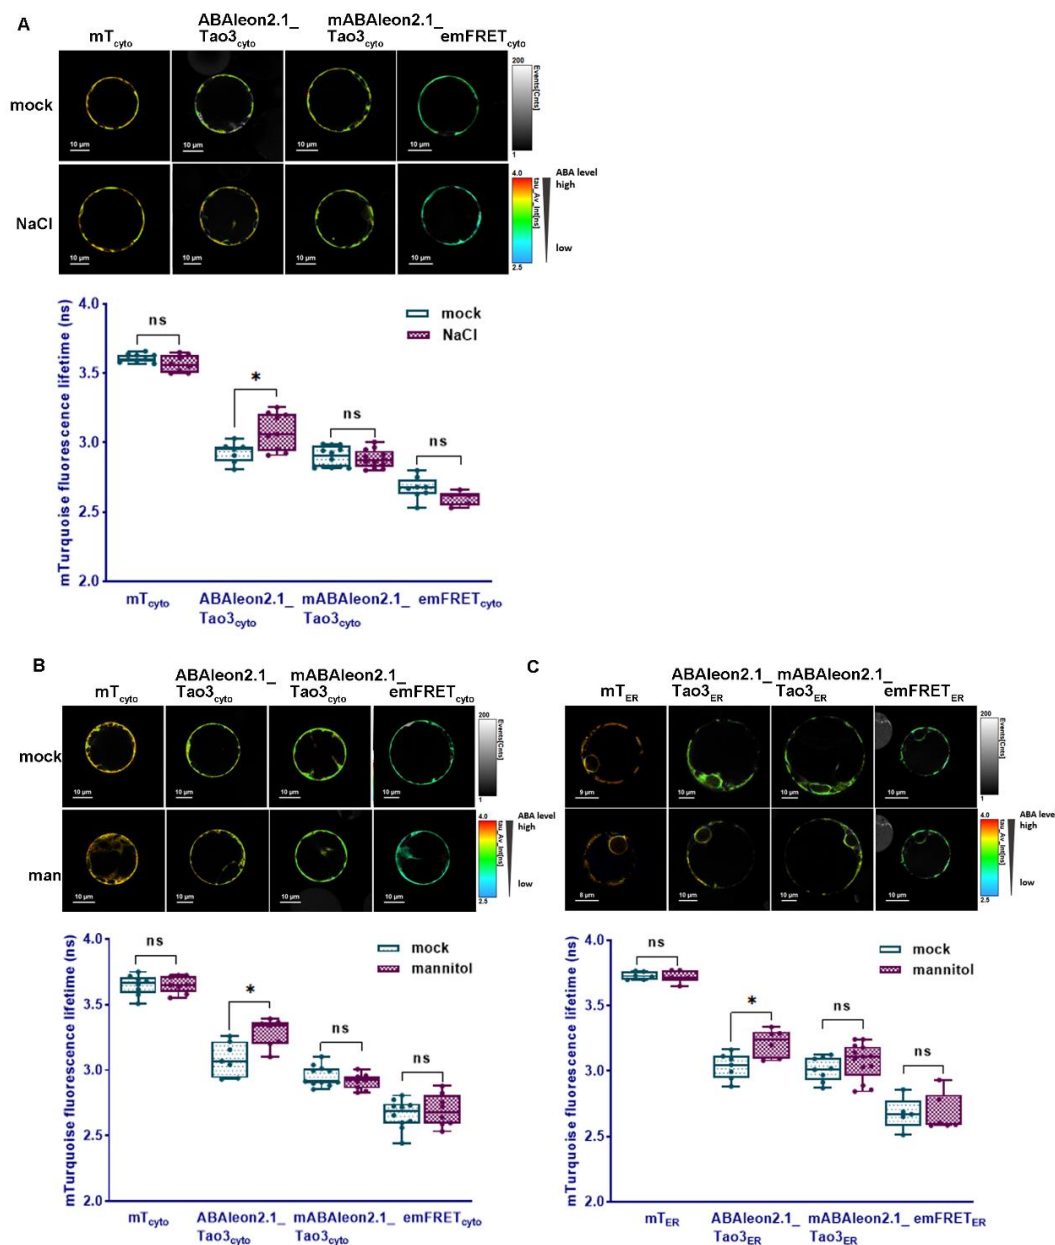

35

36 **Supplemental Figure S4** Osmotic stresses triggered specific increases in the  $\tau_{mT}$  of  
 37 ABAleon2.1\_Tao3s but not in that of donor-only controls ( $mT_{cyto}$  and  $mT_{ER}$ ), mutated  
 38 ABAleon2.1\_Tao3s ( $mABALEon2.1\_Tao3_{cyto}$  and  $mABALEon2.1\_Tao3_{ER}$ ), empty  
 39 FRET controls ( $emFRET_{cyto}$  and  $emFRET_{ER}$ ). **A** Shown are representative FLIM  
 40 images and data of cytosol-localized constructs in response to NaCl (10 mM). **B, C**  
 41 FLIM images and data of cytosolic (**B**) and ER (**C**)-resided constructs in response to  
 42 mannitol (50 mM). Data are presented as box bars with all data points. Statistics was  
 43 performed using students' t-test ( $*P < 0.05$  compared with mock treatment; ns, not  
 44 significant).

45 **Supplemental Table S1** Biochemical properties of ABA probes used in this study.

| titration range | ABA probes                       | linear regression                        |       | $\tau_{min}$ | $\tau_{max}$ | DR (%) | K'dN (4 Parameter logistic) |                  |
|-----------------|----------------------------------|------------------------------------------|-------|--------------|--------------|--------|-----------------------------|------------------|
|                 |                                  | Y-intercept [ABA <sub>exo=0</sub> ] (nM) | slope |              |              |        | nM                          | fg/cell          |
| 0 - 100 $\mu$ M | ABAleon2.1                       | 129.1                                    | 1.845 | 3.05         | 3.45         | -13.1  | 194.2                       | -                |
|                 | ABAleon2.1_Tao3 <sub>cyto</sub>  | 38.5                                     | 3.068 | 3.03         | 3.49         | -15.2  | 398.4                       | -                |
|                 | aABAleon2.1_Tao3 <sub>cyto</sub> | 217.6                                    | 2.282 | 2.95         | 3.35         | -13.6  | 114.1                       | 19.19 $\pm$ 1    |
|                 | ABAleon2.1_Tao3 <sub>ER</sub>    | 48.1                                     | 1.546 | 3            | 3.4          | -13.3  | 103.6                       | 17.73 $\pm$ 1.05 |

46

47 Biochemical properties of ABAleon2.1 and ABAleon2.1\_Tao3s in ABA titration  
 48 assays using tobacco protoplasts. Shown are titration range, different ABA probes,  
 49 linear regression models, the minimum ( $\tau_{min}$ ) and maximum ( $\tau_{max}$ ) of mTurquoise  
 50 fluorescence lifetime in each assay, the dynamic range (DR) calculated as ( $\tau_{min}$ - $\tau_{max}$ )  
 51  $\times 100/\tau_{min}$ , the original ABA affinity (K'd) (in nM) calculated from a four-parameter  
 52 logistic fit and the K'dN that was normalized by linear regression model. The  
 53 protoplasts that had been treated with ABA or mock were harvested and extraction for  
 54 measuring endogenous ABA by LC/MS. The endogenous ABA level (ng/mL) was  
 55 calculated by the equation  $[ABA]_{ng/mL} = (\text{Peak area of ABA}) \times [ABA-d6] / (\text{Peak area}$   
 56  $\text{of ABA})$ . The endogenous ABA level (nM) was calculated by the equation  $[ABA]_{nM} =$   
 57  $[ABA]_{ng/mL} \times 1000 / 264.32$ . The endogenous ABA level (fg/cell) was calculated by the  
 58 equation  $[ABA]_{fg/cell} = ([ABA]_{ng/mL} \times \text{the sample volume}) \times 1000 / \text{the total (alive)}$   
 59 number of protoplasts in each sample.

60

61 **Supplemental Table S2** Basal level of endogenous ABA in individual cells.

| Exp. No. | ABAleon2.1_Tao3 <sub>cyto</sub> -transfected cells |              |                        |                          | ABAleon2.1_Tao3 <sub>ER</sub> -transfected cells |              |                        |                          |
|----------|----------------------------------------------------|--------------|------------------------|--------------------------|--------------------------------------------------|--------------|------------------------|--------------------------|
|          | total number of protoplasts/mL                     | final volume | [ABA] <sub>ng/mL</sub> | [ABA] <sub>fg/cell</sub> | total number of protoplasts/mL                   | final volume | [ABA] <sub>ng/mL</sub> | [ABA] <sub>fg/cell</sub> |
| 1        | 1000000                                            | 0.1          | 42.49                  | 4.25                     | 1280000                                          | 0.1          | 29.69                  | 2.32                     |
| 2        | 1550000                                            | 0.1          | 25.94                  | 1.67                     | 1965000                                          | 0.1          | 28.99                  | 1.48                     |
| 3        | 2272000                                            | 0.1          | 105.37                 | 4.64                     | 2312000                                          | 0.1          | 111.73                 | 4.83                     |
| 4        | 1099000                                            | 0.2          | 10.17                  | 1.85                     | 1241600                                          | 0.2          | 12.71                  | 2.05                     |
| 5        | 1543200                                            | 0.2          | 49.01                  | 3.18                     | 1312800                                          | 0.2          | 40.42                  | 3.08                     |
| 6        | 1578200                                            | 0.2          | 43.47                  | 2.76                     | 1263200                                          | 0.2          | 37.72                  | 2.98                     |

62  
63 The total alive number of protoplasts that had been transfected with cytosolic  
64 ABAleon2.1\_Tao3 (ABAleon2.1\_Tao3<sub>cyto</sub>) or ER-targeted ABAleon2.1\_Tao3  
65 (ABAleon2.1\_Tao3<sub>ER</sub>) was counted before harvest and extraction for measuring  
66 endogenous ABA by LC/MS. The endogenous ABA level (ng/mL) was calculated by  
67 the equation  $[ABA]_{ng/mL} = (\text{Peak area of ABA}) \times [ABA-d6] / (\text{Peak area of ABA})$ . The  
68 endogenous ABA level (fg/cell) was calculated by the equation  $[ABA]_{fg/cell} =$   
69  $([ABA]_{ng/mL} \times \text{the final volume of each sample}) \times 1000000 / \text{the total alive number of}$   
70 protoplasts in each sample. Data are from six independent experiments.

71

72 **Supplemental Table S3** Oligonucleotides and plasmids used in this study.

| <b>New fragment (vector)</b> | <b>Primers</b>                                     | <b>Sequence (5'-3')</b>                                                                                                       | <b>Template</b> | <b>Recipient Vector</b>                   |
|------------------------------|----------------------------------------------------|-------------------------------------------------------------------------------------------------------------------------------|-----------------|-------------------------------------------|
| <b>CNX-HA-Nbs (pYLZ06)</b>   | <u>NheI</u> -HA-S                                  | CG <u>gctagcat</u> gtatccttatg<br>atgttcctgat                                                                                 | pSF087*         | pYLZa06<br>(CNX-GFP)<br>cut<br>NheI/BamHI |
|                              | HA-Nbs- <u>BamHI</u> -AS                           | GCTGAT <u>ggatcc</u> tagct<br>gctcacggtcacctgggtg                                                                             |                 |                                           |
| <b>cytRFP (pYLZ13)</b>       | 35S- <u>EcoRI</u> -S                               | TGCAGC <u>gaattc</u> tactacgc<br>agcagggtctcatcaagacg                                                                         | pFK098*         | pSF074 cut<br>EcoRI/BamHI                 |
|                              | RFP- <u>BamHI</u> -AS                              | GCTGAT <u>ggatcc</u> tcttaga<br>ttatgctccagtactgtggc                                                                          |                 |                                           |
| <b>CNX-RFP (pYLZ18)</b>      | <u>NheI</u> -RFP-S                                 | CG <u>gctagcat</u> ggcctctccc<br>gaggac                                                                                       | pYLZ13          | pYLZa06<br>(CNX-GFP)<br>cut<br>NheI/BamHI |
|                              | <u>BamHI</u> -RFP-AS                               | GCTGAT <u>ggatcc</u> tcttaga<br>ttatgctccagtactgtggc                                                                          |                 |                                           |
| <b>RFP-CNX (pYLZ14)</b>      | 35S- <u>EcoRI</u> -S                               | TGCAGC <u>gaattc</u> tactacgc<br>agcagggtctcatcaagacg                                                                         | pSF074*         | pSF074 cut<br>EcoRI/BamHI                 |
|                              | 35S- <u>ClaI</u> -AS                               | GCTGAT <u>atcgat</u> atagag<br>agagagatagatttatag                                                                             |                 |                                           |
|                              | spRFP- <u>ClaI</u> -S                              | TGCACG <u>atcgat</u> gaggct<br>ttgtaaattcacagctctctcttc<br>tctactattttctctcctactgcttt<br>ctgctagcatggcctcctccga<br>ggacgtcatc | pYLZ13          |                                           |
|                              | RFP- <u>XmaI</u> -AS                               | GCTGAT <u>cccggg</u> tgtctcc<br>agtactgtggcggcctcgg                                                                           |                 |                                           |
| CNX- <u>XmaI</u> -S          | GCTGAT <u>cccggg</u> catatg<br>gaactgattgagaaagccg | pSF087*                                                                                                                       |                 |                                           |

|                                                      |                                  |                                                                                                                                                      |                          |                           |
|------------------------------------------------------|----------------------------------|------------------------------------------------------------------------------------------------------------------------------------------------------|--------------------------|---------------------------|
|                                                      | CNX- <u>BamHI</u> -AS            | TGCACG <u>ggatcc</u> taatt<br>atcacgtctcggttgcct                                                                                                     |                          |                           |
| <b>smT-PYR1</b><br><b>(pYLZ21)</b>                   | 35S- <u>EcoRI</u> -S             | TGCAGC <u>gaattc</u> ctacgc<br>agcaggtctcatcaagacg                                                                                                   | pSF074*                  | pSF074 cut<br>EcoRI/BamHI |
|                                                      | 35S- <u>ClaI</u> -AS             | GCTGAT <u>atcgat</u> atagag<br>agagagatagatttatag                                                                                                    |                          |                           |
|                                                      | spmT- <u>ClaI</u> -S             | TGCACG <u>atcgat</u> gaggct<br>ttgtaaattcacagctctctcttc<br>tctactattttctctcctactgcttt<br>ctgctagcgccatggtgagca<br>aggcgaggagctgt                     | h2.1-L<br>(mT-<br>PYR1)  |                           |
|                                                      | PYR1- <u>BamHI</u> -AS           | GCTGAT <u>ggatccc</u> gtcac<br>ctgagaaccacttcgcacc                                                                                                   |                          |                           |
| <b>mT-PYR1</b><br><b>(pYLZ25)</b>                    | <u>EcoRI</u> -35S-S              | TGCAGC <u>gaattc</u> ctacgc<br>agcaggtctcatcaagacg                                                                                                   | pSF074*                  | pYLZ21 cut<br>EcoRI/NheI  |
|                                                      | <u>NheI</u> -35S-AS              | GCG <u>gctagc</u> atatagagag<br>agagatagatttatagagag                                                                                                 |                          |                           |
| <b>sBAleon2.1</b><br><b>_Tao3</b><br><b>(pYLZ24)</b> | linker3-ABI1-<br><u>BamHI</u> -S | GCTGAT <u>ggatccc</u> gtgga<br>ggcgttgatcctgataatgaag<br>catacgaatgccttctgaaga<br>aggctatcaagattatgaaccg<br>gaggctggtggaggcagtgt<br>gcctttgatggtttac | h2.1-S<br>(ABI1-<br>cpV) | pYLZ21<br>cut BamHI       |
|                                                      | cpV- <u>BamHI</u> -AS            | TGCAGC <u>ggatccc</u> tactc<br>gatgttgggcgatcttgaag                                                                                                  |                          |                           |
| <b>ABALEON2.1</b><br><b>_Tao3</b><br><b>(pYLZ23)</b> | 35S- <u>EcoRI</u> -S             | TGCAGC <u>gaattc</u> ctacgc<br>agcaggtctcatcaagacg                                                                                                   | pSF074*                  | pYLZ24 cut<br>EcoRI/NheI  |
|                                                      | 35S- <u>NheI</u> -AS             | GCG <u>gctagc</u> atatagagag<br>agagatagatttatagagag                                                                                                 |                          |                           |



|                                          |                                  |                                                               |         |                           |
|------------------------------------------|----------------------------------|---------------------------------------------------------------|---------|---------------------------|
| <b>smT-PYR1-linker3</b><br>(pYZW81)      | <u>Psp</u> -PYR1-F               | GACGAGCTGTACA<br>AGGGGCCCATGCC<br>TTCGGAGTTAACA<br>CCAGAAGAAC | pYLZ24  | pYLZ21 cut<br>Psp/BamHI   |
|                                          | <u>BamHI</u> -linker3-PYR-R      | TGAACGATCTGCTT<br>CGGATCCCTAGCCT<br>CCACCAGCCTCCG<br>G        |         |                           |
| <b>mT-PYR1-linker3</b><br>(pYZW82)       | <u>EcoRI</u> -35S-S              | TGCAGCgaattcctacgc<br>agcaggtctcatcaagacg                     | pSF074* | pYZW81 cut<br>EcoRI/NheI  |
|                                          | <u>NheI</u> -35S-AS              | GCGgctagcatatagagag<br>agagatagattatagagag                    |         |                           |
| <b>sRFP-PYR1</b><br>(pYLZa02)            | PYR1- <u>XmaI</u> -S             | ATGCcccgggatgccttcg<br>gagttaacaccagaaga                      | pYLZ21  | pYLZ14 cut<br>NheI/XmaI   |
|                                          | PYR1- <u>BamHI</u> -AS           | GATCggatccctacgtcac<br>ctgagaaccactccg                        |         |                           |
| <b>sRFP-PYR1</b><br>(R116G)<br>(pYLZa05) | RFP3'- <u>XmaI</u> -<br>PYR1-S   | cacagtactggagcaccggg<br>gatgccttcggagttaacac                  | pYLZ21  | pYLZa02 cut<br>XmaI/BamHI |
|                                          | PYR1 (R116G)-AS                  | attcgtcagcccatgttcgcctc<br>cgatgatactgaatcc                   |         |                           |
|                                          | PYR1 (R116G)-S                   | gcgaacatgggctgacgaatt<br>acaaatccgttacgacggt                  |         |                           |
|                                          | 3'nos- <u>BamHI</u> -<br>PYR1-AS | gaacgatctgcttcggatccct<br>acgtcacctgagaaccac                  |         |                           |
| <b>smT-PYR1</b><br>(R116G)<br>(pYLZ33)   | sp- <u>NcoI</u> -mT-S            | tgctttctgctagcgcctatggtg<br>agcaagggcgaggagctgt               | pYLZ21  | pYLZ40 cut<br>NcoI/BamHI  |
|                                          | GC-mT-AS                         | catgggcccttgtagacgctcg<br>tccatgccgagag                       |         |                           |

|                                         |                                   |                                                                                                                                                       |                          |                           |
|-----------------------------------------|-----------------------------------|-------------------------------------------------------------------------------------------------------------------------------------------------------|--------------------------|---------------------------|
|                                         | GC-PYR1-S                         | <u>tacaaggggccatgccttcg</u><br>gagttaacaccagaag                                                                                                       | pYLZa05                  |                           |
|                                         | 3'nos- <u>BamHI</u> -<br>PYR1'-AS | gaacgatctgctt <u>ggatccc</u> g<br>tcacctgagaaccac                                                                                                     |                          |                           |
| <b>sBAleon2.1_Tao3 (R116G) (pYLZ34)</b> | Linker3-ABI1-<br><u>BamHI</u> -S  | GCTGAT <u>ggatccc</u> ggtgga<br>ggcgttgatcctgataatgaag<br>catacgaatgccttctgaaga<br>aggctatcaagattatgaaccg<br>gaggctggtggaggcagtgt<br>gcctttgatggtttac | h2.1-S<br>(ABI1-<br>cpV) | pYLZ33<br>cut BamHI       |
|                                         | cpV- <u>BamHI</u> -AS             | TGCAGC <u>ggatccc</u> tactc<br>gatgttggcggatcttgaag                                                                                                   |                          |                           |
| <b>ABALEon2.1_Tao3 (R116G) (pYLZ35)</b> | 35S- <u>EcoRI</u> -S              | TGCAGC <u>gaattc</u> ctacgc<br>agcaggctcatcaagacg                                                                                                     | pSF074*                  | pYLZ34 cut<br>EcoRI/NheI  |
|                                         | 35S- <u>NheI</u> -AS              | GCG <u>ctagc</u> atatagagag<br>agagatagattatagagag                                                                                                    |                          |                           |
| <b>smT (pYLZ40)</b>                     | <u>EcoRI</u> -35S-S               | TGCAGC <u>gaattc</u> ctacgc<br>agcaggctcatcaagacg                                                                                                     | pYLZ21                   | pSF074 cut<br>EcoRI/BamHI |
|                                         | mT-BamHI-AS                       | GCTGAT <u>ggatccc</u> ttgtac<br>agctcgtccatgccgagag                                                                                                   |                          |                           |
| <b>smT-linker3-cpV (pYLZ41)</b>         | linker3-cpV-<br>BamHI-S           | GCTGAT <u>ggatccc</u> ggtgga<br>ggcgttgatcctgataatgaag<br>catacgaatgccttctgaaga<br>aggctatcaagattatgaaccg<br>gaggctggtggaggcatgga<br>cggcggcgtgcagctc | h2.1-S<br>(ABI1-<br>cpV) | pYLZ40 cut<br>BamHI       |
|                                         | cpV-BamHI-AS                      | TGCAGC <u>ggatccc</u> tactc<br>gatgttggcggatcttgaag                                                                                                   |                          |                           |

|                                         |                      |                                                     |         |                          |
|-----------------------------------------|----------------------|-----------------------------------------------------|---------|--------------------------|
| <b>mT-linker3-<br/>cpV<br/>(pYLZ46)</b> | 35S- <u>EcoRI</u> -S | TGCAGC <u>gaattc</u> ctacgc<br>agcaggtctcatcaagacg  | pSF074* | pYLZ41 cut<br>EcoRI/NheI |
|                                         | 35S- <u>NheI</u> -AS | GCG <u>gctagc</u> atatagagag<br>agagatagattatagagag |         |                          |

73 \*, plasmids kindly provided by Dr. Peter Pimpl.

74 h2.1, ABAlcon2.1, kindly provided by Dr. Waadt.

75
